# Supplementary material for: Carbon dots as nanoantennas for anti-inflammatory drug analysis using surface-assisted laser desorption/ionization time-of-flight mass spectrometry in serum
Source: Royal Society of Chemistry journal article supplement (doi:10.1039/c4ra04267k), 2014-01-01

### Supporting figures

Fig. S1 MALDI-MS Spectra of (A) DHB matrix, and (B) MFA with DHB as matrix.

Fig.S2. MALDI-MS spectra of MFA (A) LDI-MS without any matrix (B) with C-dots as matrix in positive mode.

Fig.S3. MALDI-MS spectra of MFA (A) LDI-MS without any matrix (B) with C-dots as matrix in negative mode.

Fig.S4. MALDI-MS sample to sample reproducible spectra of MFA (A) without (B) with C-dots as matrix in positive mode.

Fig.S5. MALDI-MS sample to sample reproducible spectra of MFA (A) without (B) with C-dots as matrix in negative mode.

Fig. S6 Calibration curves for the quantification of MFA (10-100 ng/ $\mu$ L in serum with positive (A) and negative ion mode (B)).

Fig. S1

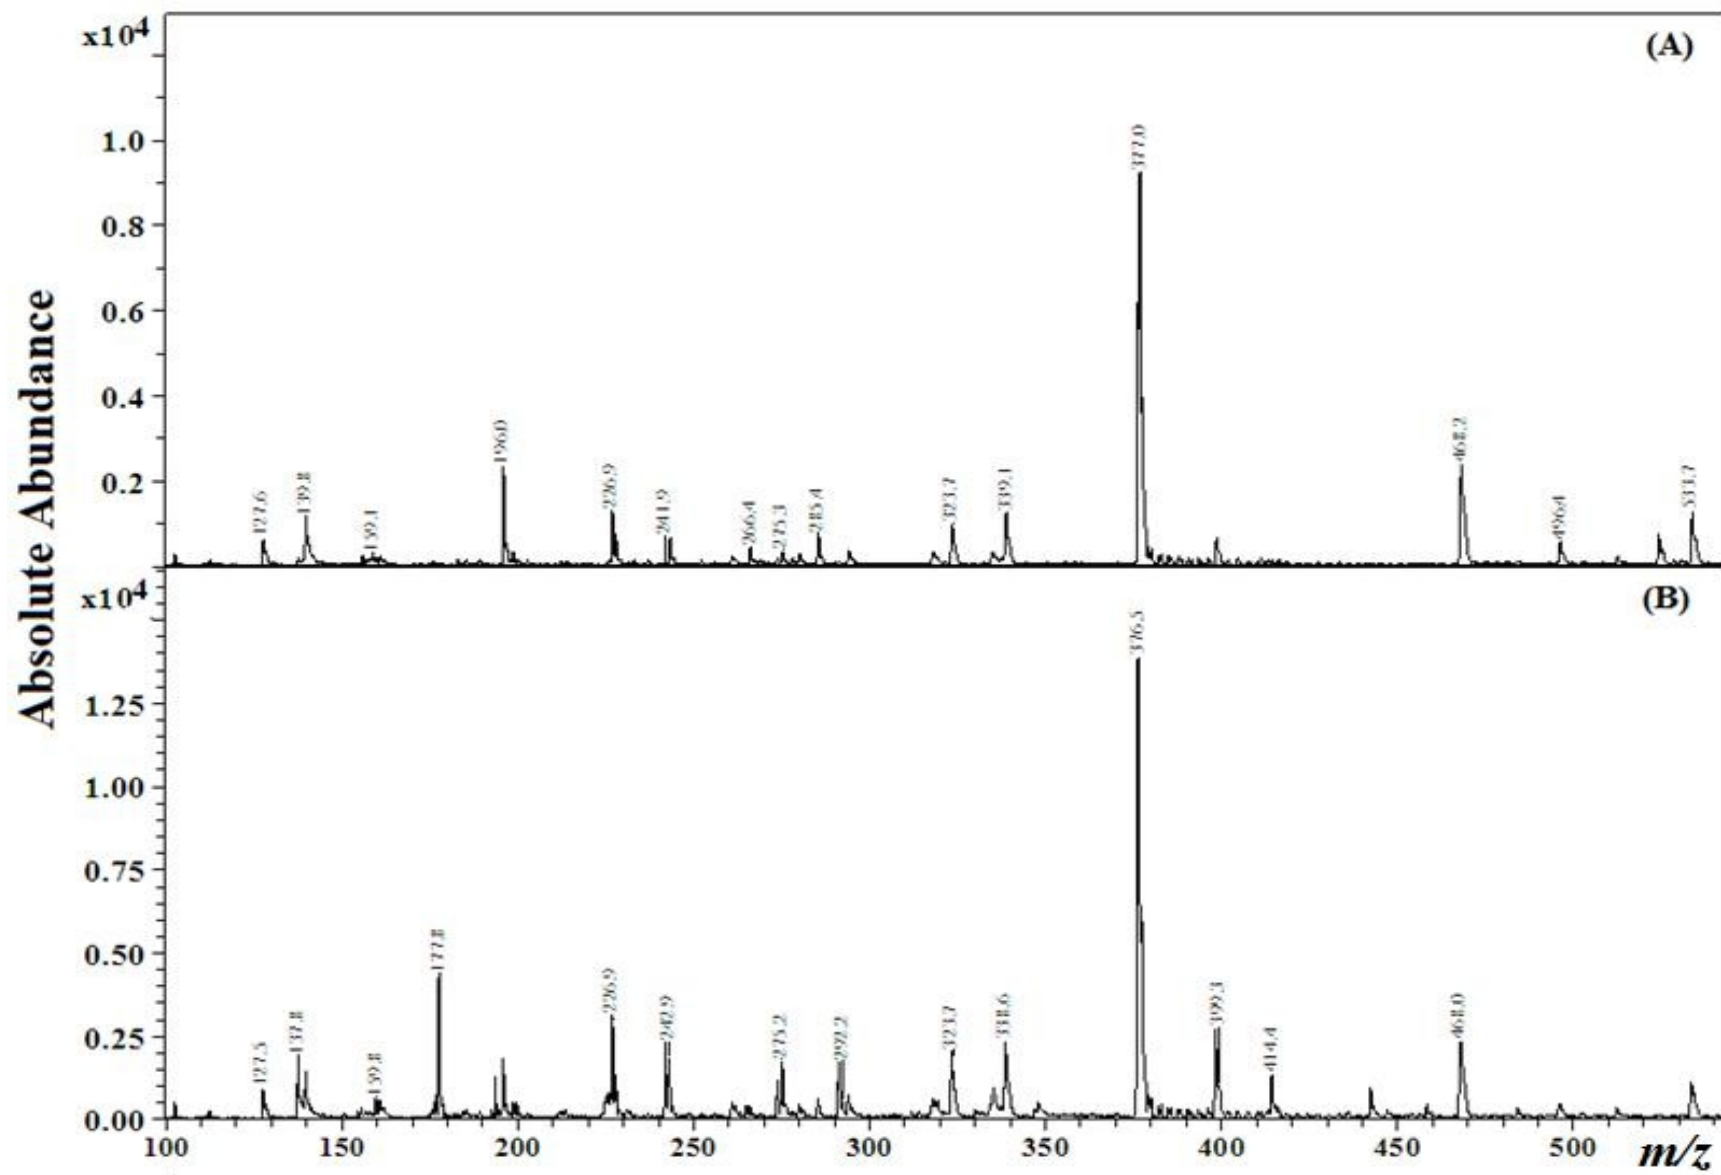

**Fig. S2**

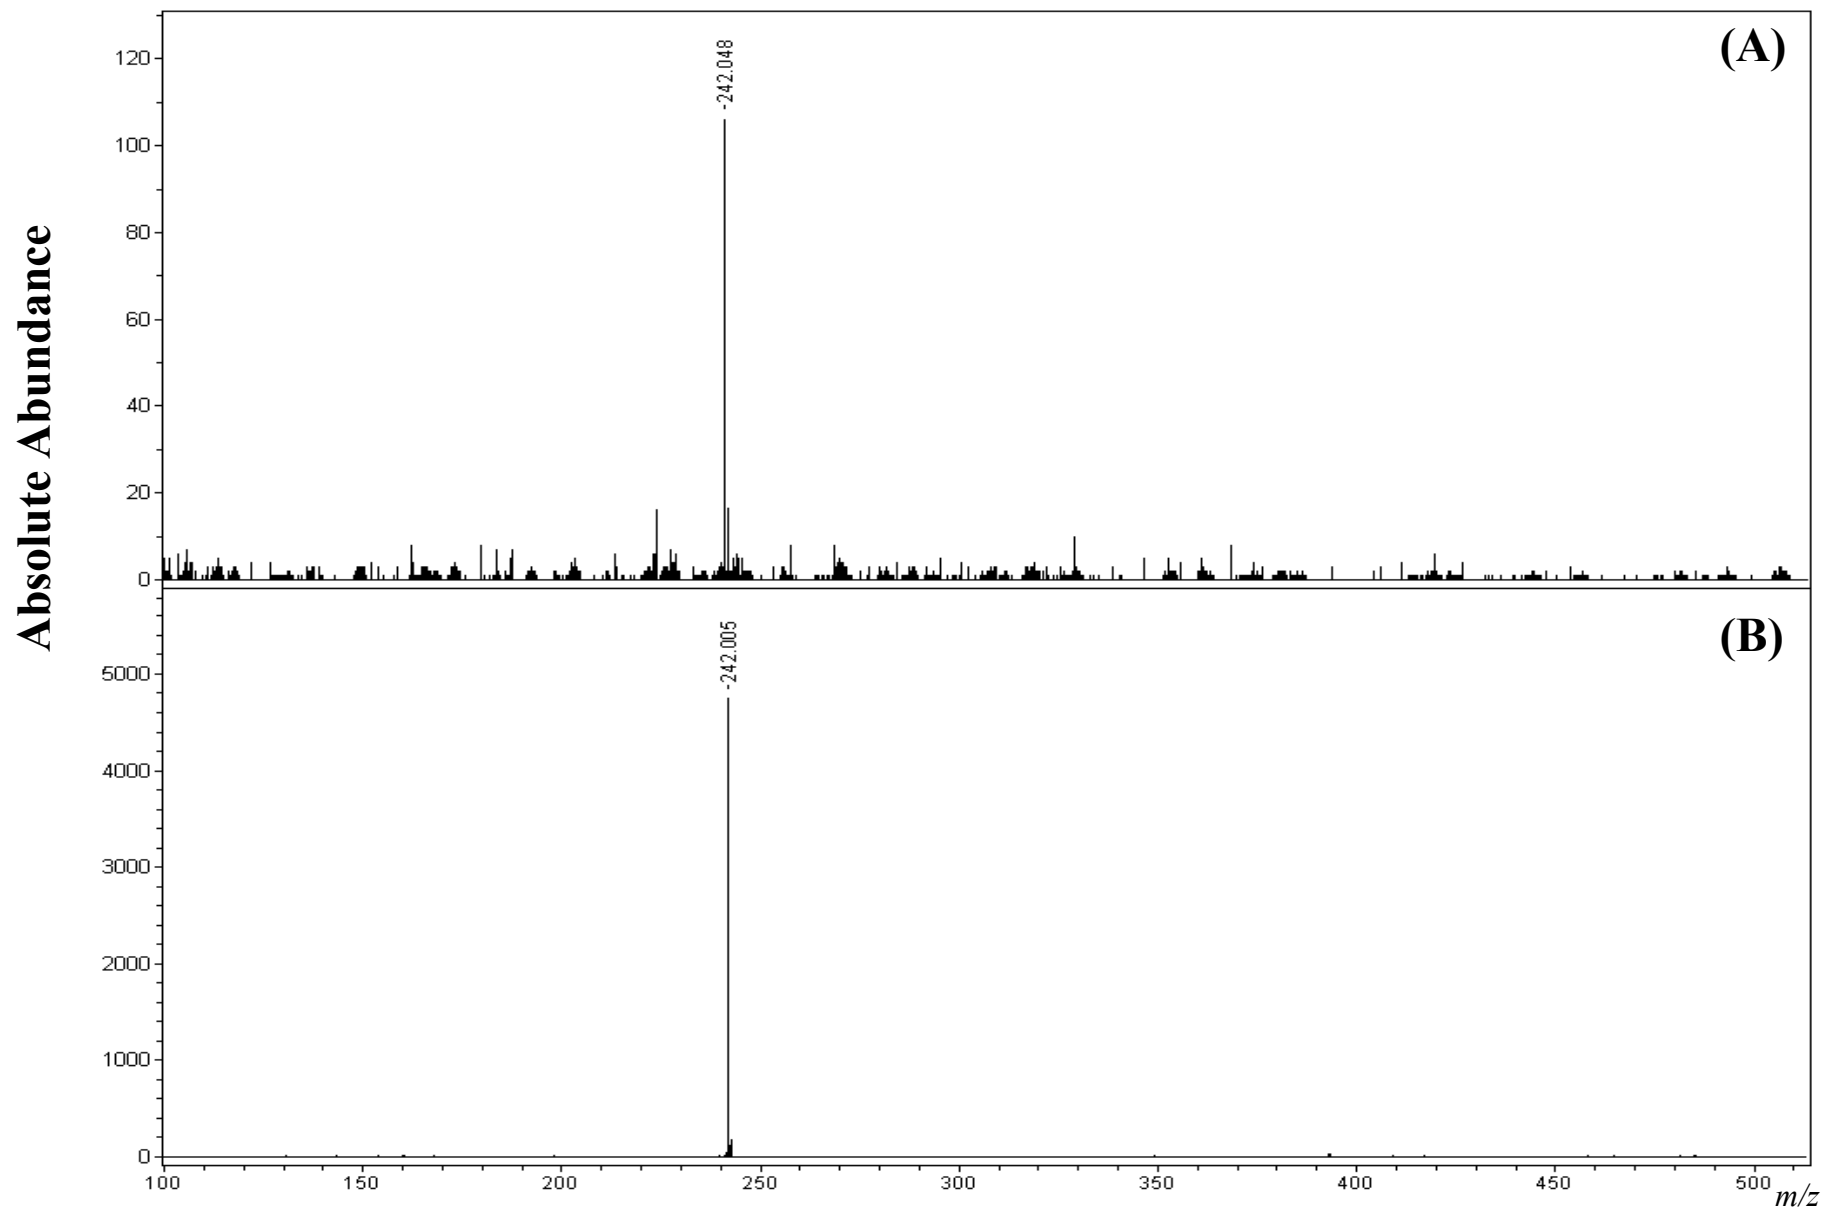

**Fig. S3**

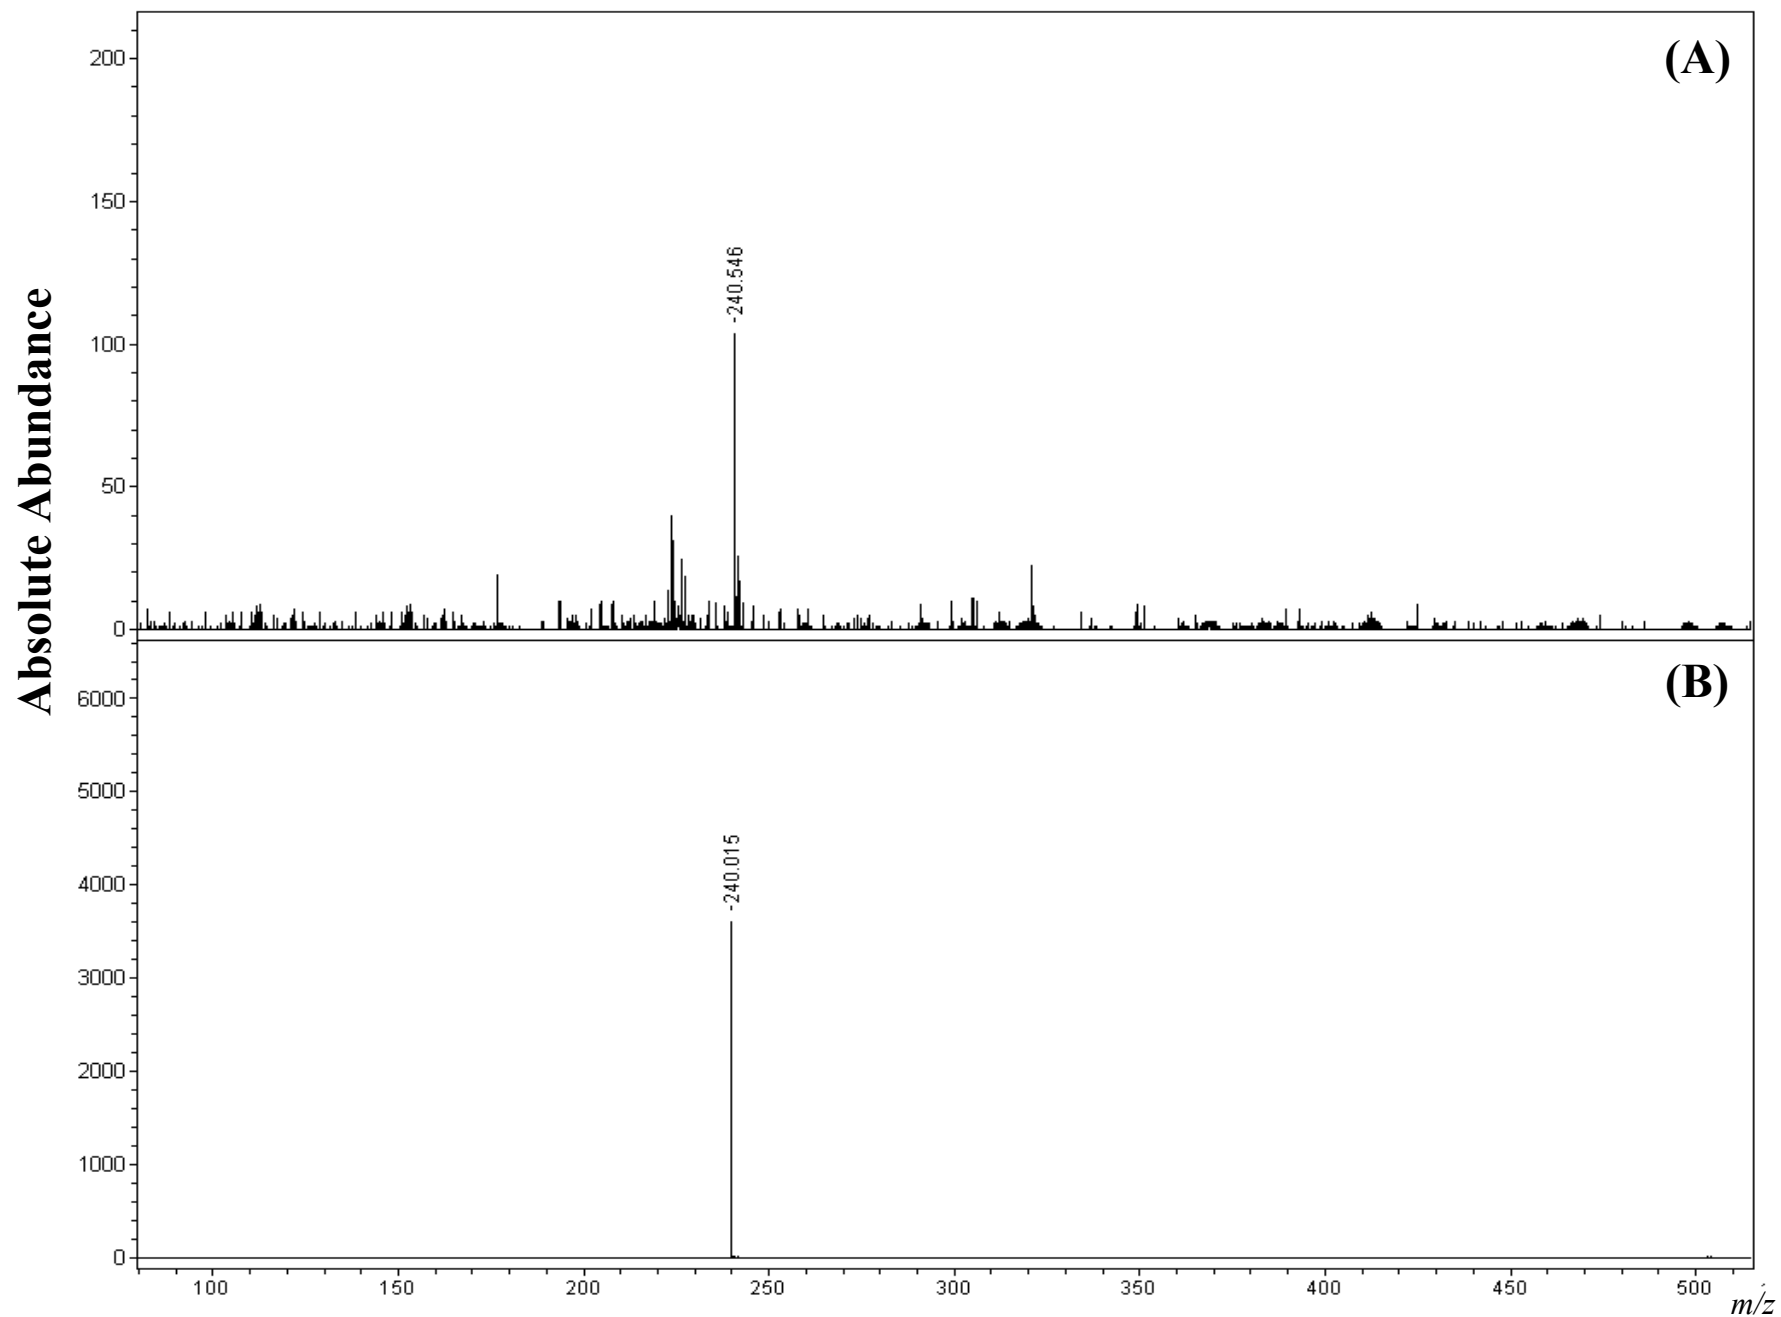

**Fig. S4**

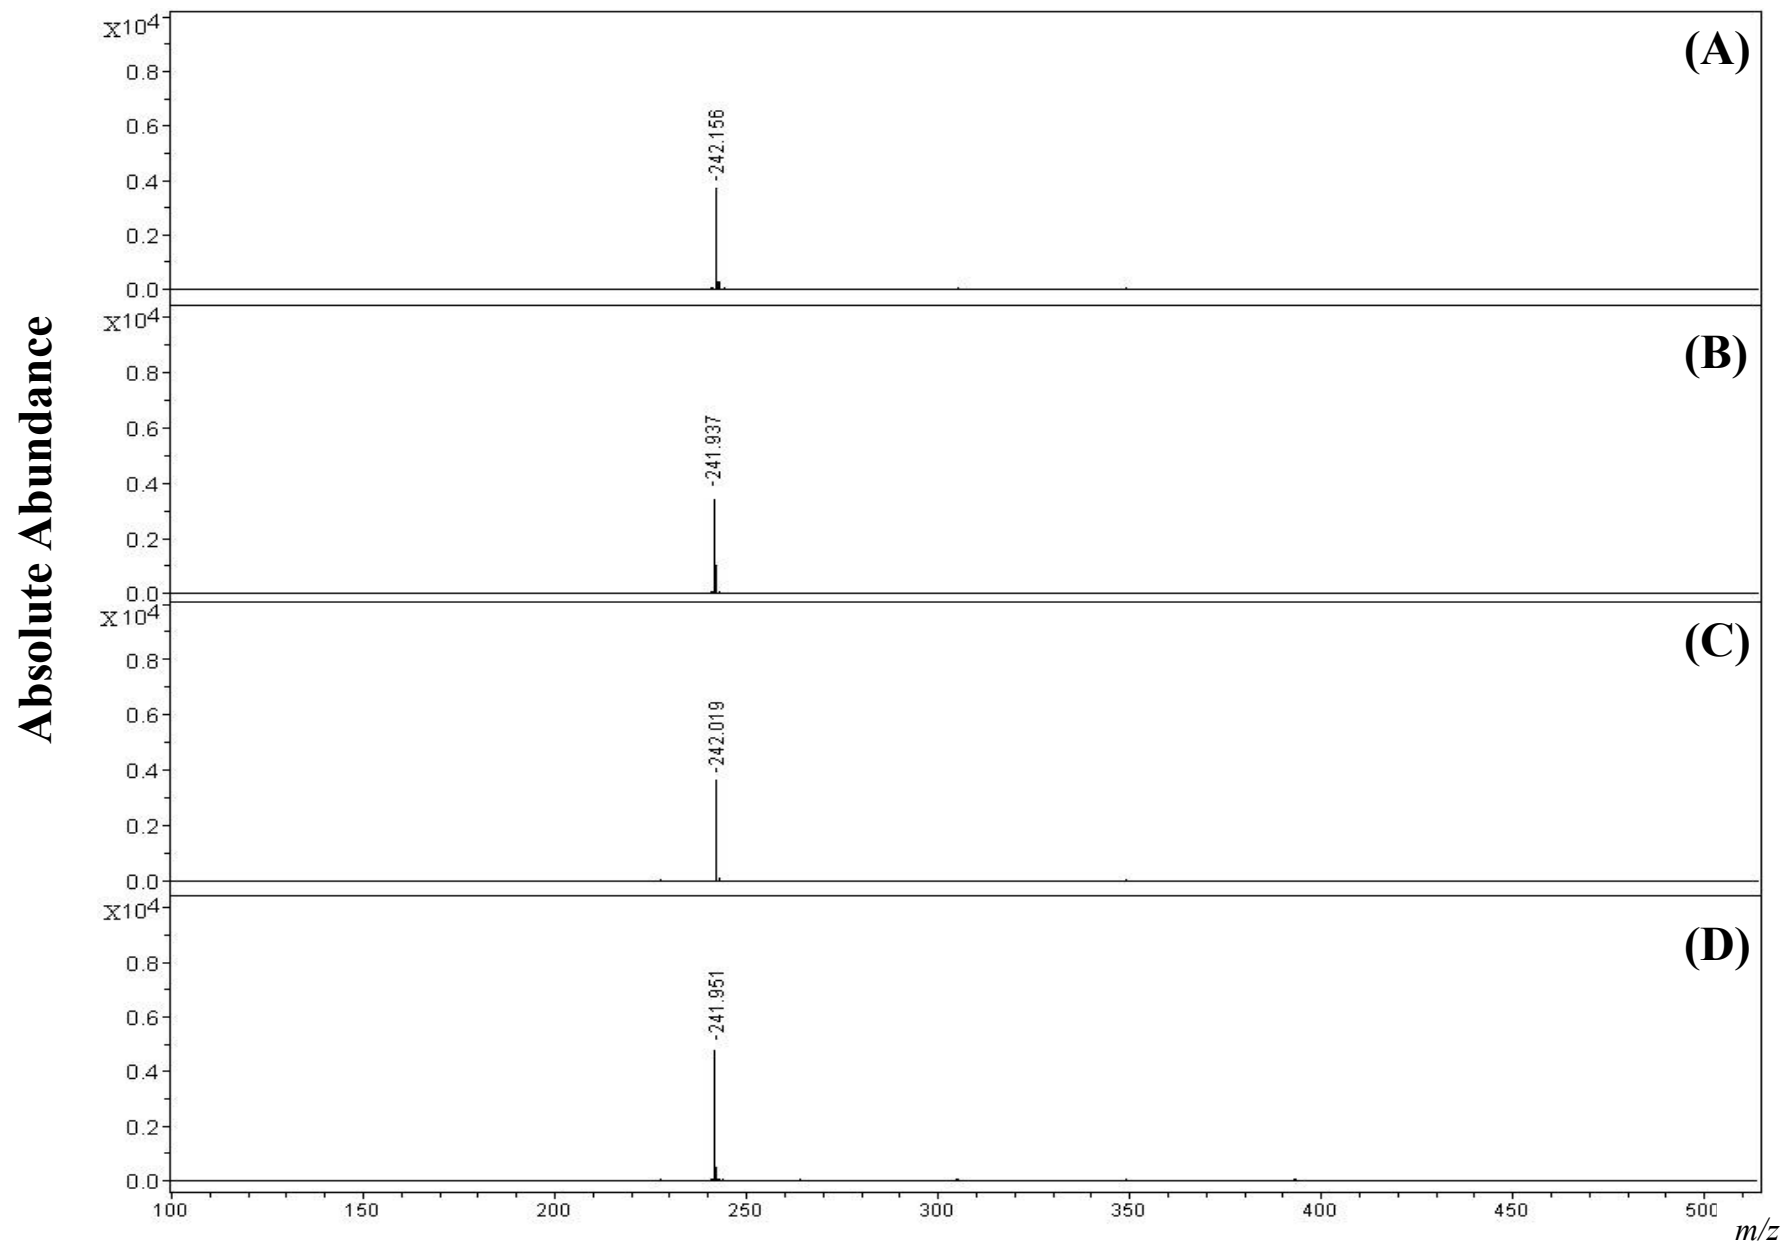

**Fig. S5**

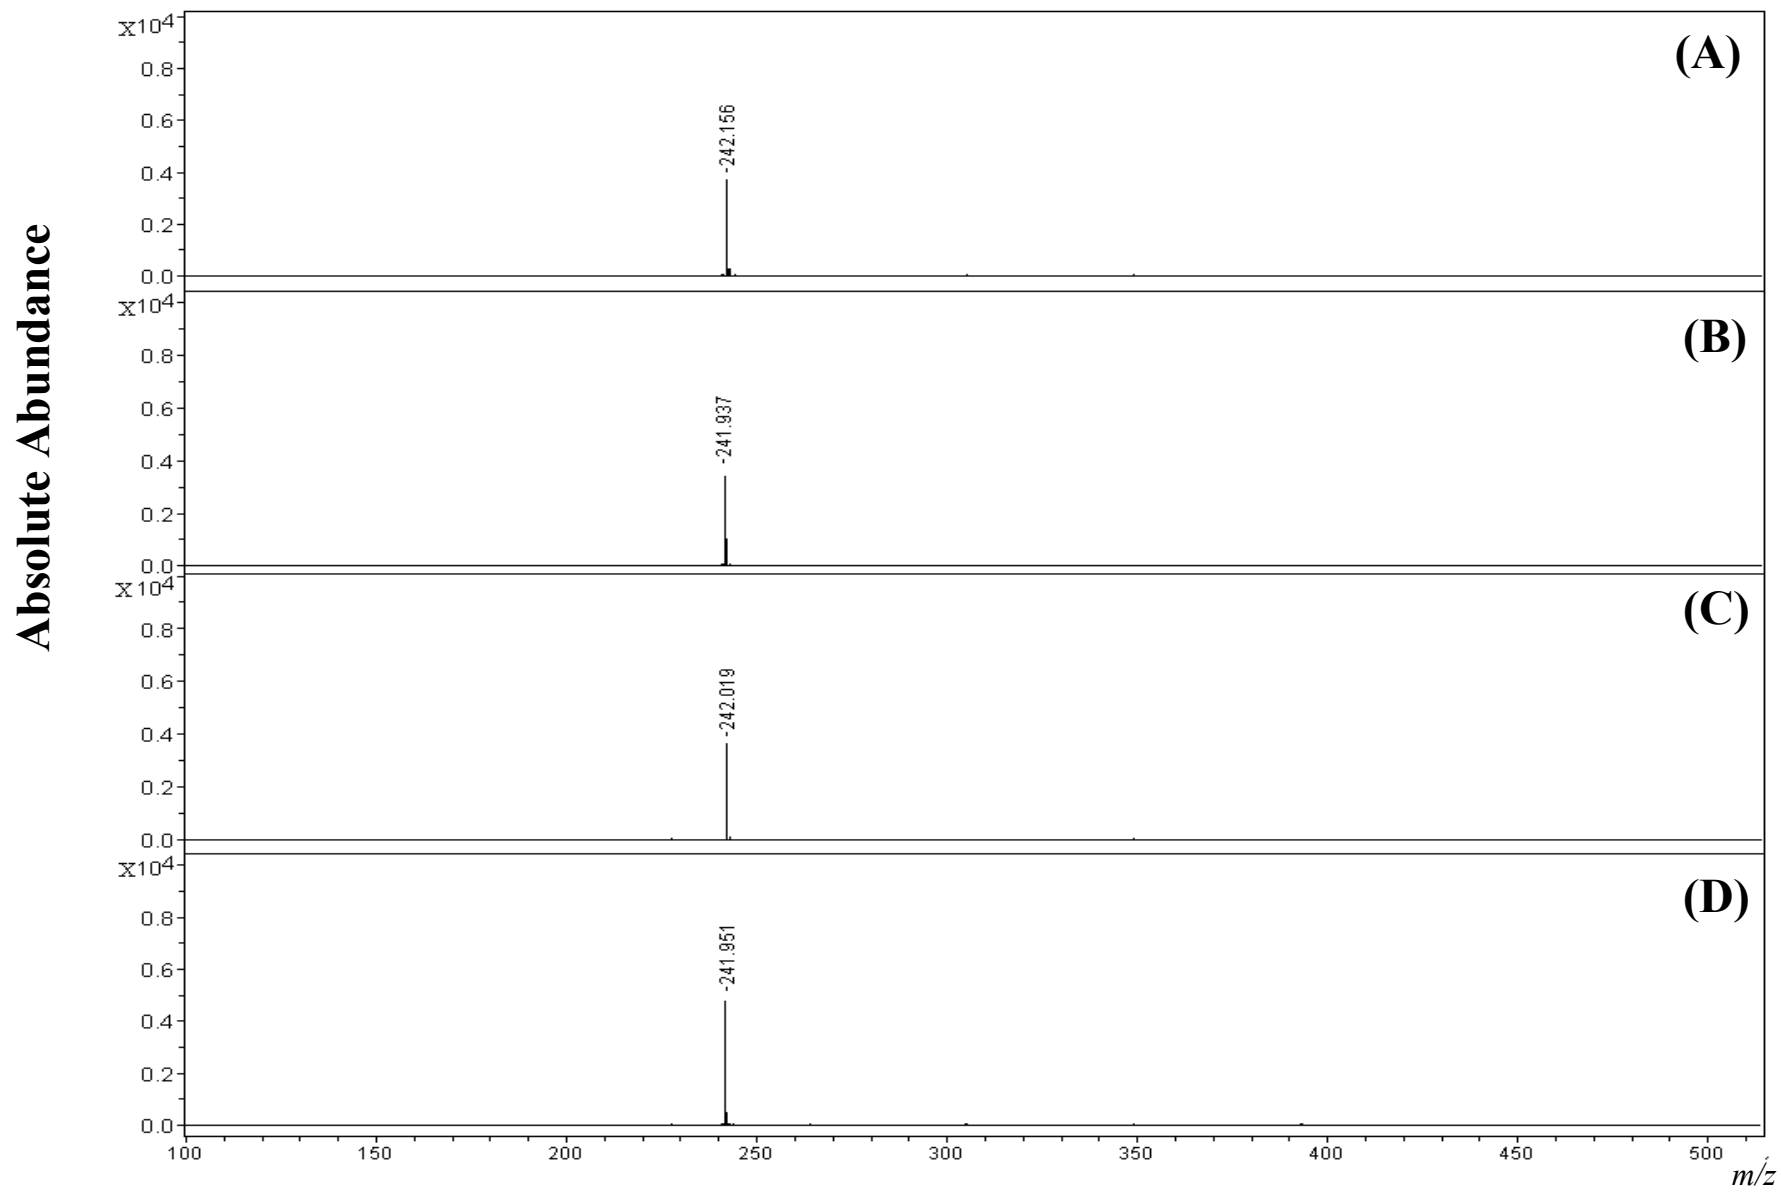

**Fig. S6**

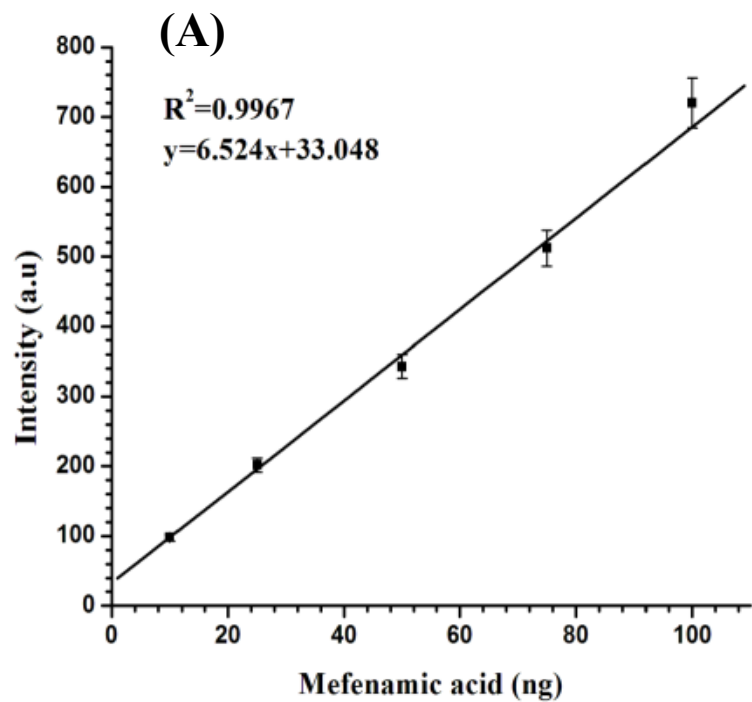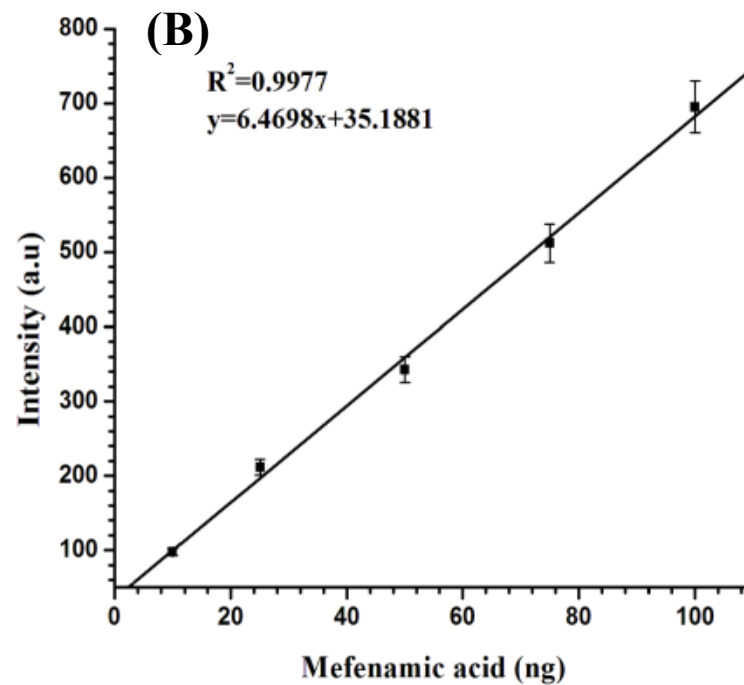

Supplement: c4ra04267k1.pdf [file c4ra04267k1.pdf]
